# Supplementary material for: MIF-Dependent Control of Tumor Immunity
Source: PubMed Central journal article supplement (PMC7724107; doi:10.3389/fimmu.2020.609948), 2020-11-25
Supplement: Table_1.pdf [file Table_1.pdf]

| Cell Type       | Effect                                                     | Reference               |
|-----------------|------------------------------------------------------------|-------------------------|
| TAMs            | Tumor-derived MIF: ↑ monocyte-mediated angiogenesis        | 88                      |
|                 | Stromal-derived MIF: ↑ macrophage-mediated angiogenesis    | 89, 90                  |
|                 | Stromal-derived MIF: ↑ M2 macrophage polarization          | 90,91                   |
| MDSCs           | Tumor-derived MIF: ↑ M-MDSC differentiation                | 95, 104, 105, 106, 107  |
|                 | Tumor-derived MIF: ↑ MDSC-mediated immunosuppression       | 96, 97                  |
|                 | Stromal-derived MIF: ↑ M-MDSC and G-MDSC immunosuppression | 90, 100, 101            |
| Dendritic Cells | Tumor-derived MIF: ↓ DC infiltration and effector function | 112-116                 |
|                 | ↓ DC-mediated presentation of tumor-associated antigens    | 104, 112                |
| TANs            | Tumor-derived MIF: ↑ TAN chemotaxis and activation         | 119, 123                |
| NK cells        | Tumor-derived MIF: ↓ NK cell cytolytic activity            | 127, 128, 129           |
|                 | Regulating NK cell recognition of MHC molecules            | 130                     |
| T cells         | ↑ Th2 T cell expansion                                     | 7                       |
|                 | ↓ CTL-mediated cytolytic activity                          | 141                     |
|                 | Tumor-derived MIF: ↑ activation-induced T cell death       | 114                     |
|                 | Stromal-derived MIF: ↑ T <sub>reg</sub> expansion          | 151                     |
|                 | ↑ γΔ T cell-mediated IL-17 production                      | 162, 163                |
|                 | ↑ Th17 T cell-mediated IL-17 production                    | 163, 173, 174, 175, 179 |
|                 | ↑ Th17 T cell expansion and migration                      | 172                     |
| B cells         | ↓ B cell immunoglobulin synthesis                          | 183, 184                |
|                 | Regulation of B cell survival                              | 187, 188, 189           |
|                 | Regulation of B cell differentiation/activation            | 190                     |
